# Supplementary material
Source: MDPI journal article supplement (https://www.mdpi.com/2035-8377/15/1/9)
Supplement: s1 [file s1]

# Supplementary

**Table S1.** Descriptive Statistics for the Study Sample.

|                                  |            | Frequency | Percent |
|----------------------------------|------------|-----------|---------|
| Group                            | Respondent | 39        | 49.3    |
|                                  | Resistant  | 40        | 50.7    |
| Gender                           | Female     | 55        | 69.4    |
|                                  | Male       | 24        | 30.6    |
| Education                        | No         | 35        | 56.6    |
|                                  | Yes        | 44        | 43.4    |
| Smoking                          | No         | 71        | 91.7    |
|                                  | Yes        | 8         | 8.3     |
| Inflammatory disease             | No         | 19        | 12.9    |
|                                  | Yes        | 60        | 87.1    |
| Chronic Disease                  | No         | 19        | 12.9    |
|                                  | Yes        | 60        | 87.1    |
| Currently Taking AD              | No         | 7         | 8.1     |
|                                  | Yes        | 72        | 91.9    |
| Improvement with medications     | No         | 39        | 56.5    |
|                                  | Yes        | 40        | 43.5    |
| Hospitalization                  | No         | 73        | 83.9    |
|                                  | Yes        | 6         | 16.1    |
| Family History                   | No         | 67        | 87.1    |
|                                  | Yes        | 12        | 12.9    |
| Suicide                          | No         | 74        | 87.1    |
|                                  | Yes        | 5         | 12.9    |
| Repeated visits                  | No         | 65        | 40.3    |
|                                  | Yes        | 14        | 59.7    |
| Change of AD in cthe urrent year | No         | 47        | 62.9    |
|                                  | Yes        | 32        | 37.1    |
| Adherence                        | No         | 22        | 11.3    |
|                                  | Yes        | 57        | 88.7    |

AD: antidepressant.

**Table S2.** Comparison of the Treatment Respondent Group vs. Treatment Resistant Group in the Demographic and Clinical Data.

|                              |        | Group        |             | P-value |
|------------------------------|--------|--------------|-------------|---------|
|                              |        | Respondent   | Resistant   |         |
| Gender                       | Female | 24<br>54.5%  | 31<br>77.5% | 0.061   |
|                              | Male   | 15<br>45.5%  | 9<br>22.5%  |         |
| Education                    | No     | 11<br>40.0%  | 24<br>63.2% | 0.125   |
|                              | Yes    | 28<br>60.0%  | 14<br>36.8% |         |
| Smoking                      | No     | 36<br>90.9%  | 35<br>92.1% | >0.999  |
|                              | Yes    | 3<br>9.1%    | 3<br>7.9%   |         |
| Inflammatory disease         | No     | 15<br>18.2%  | 4<br>10.0%  | 0.438   |
|                              | Yes    | 24<br>81.8%  | 36<br>90.0% |         |
| Chronic Disease              | No     | 14<br>13.6%  | 5<br>12.5%  | >0.999  |
|                              | Yes    | 25<br>86.4%  | 35<br>87.5% |         |
| Taking AD                    | No     | 6<br>18.2%   | 1<br>2.5%   | 0.049   |
|                              | Yes    | 33<br>81.8%  | 39<br>97.5% |         |
| Improvement with medications | No     | 0<br>0.0%    | 35<br>87.5% | <0.001  |
|                              | Yes    | 39<br>100.0% | 5<br>12.5%  |         |
| Hospitalization              | No     | 38<br>95.5%  | 31<br>77.5% | 0.082   |
|                              | Yes    | 1<br>4.5%    | 9<br>22.5%  |         |
| Family History               | No     | 36<br>86.4%  | 35<br>87.5% | >0.999  |
|                              | Yes    | 3<br>13.6%   | 5<br>12.5%  |         |
| Suicide                      | No     | 39<br>100.0% | 32<br>80.0% | 0.042   |
|                              |        |              |             |         |

|                              |     |             |             |        |
|------------------------------|-----|-------------|-------------|--------|
|                              | Yes | 0<br>0.0%   | 8<br>20.0%  |        |
|                              | No  | 33<br>72.7% | 9<br>22.5%  |        |
| Repeated visits              |     |             |             | <0.001 |
|                              | Yes | 6<br>27.3%  | 31<br>77.5% |        |
|                              | No  | 38<br>95.5% | 18<br>45.0% |        |
| Change of AD in current year |     |             |             | <0.001 |
|                              | Yes | 1<br>4.5%   | 22<br>55.0% |        |
|                              | No  | 35<br>18.2% | 3<br>7.5%   |        |
| Adherence                    |     |             |             | 0.002  |
|                              | Yes | 4<br>81.8%  | 37<br>92.5% |        |
| Age Mean (SD)                |     | 51.5(17.3)  | 49.8(15.3)  | 0.481  |
| BMI Mean (SD)                |     | 33.7(9.2)   | 31.3(7.6)   | 0.205  |

AD: antidepressants; BMI: body mass index; SD: standard deviation.

The variables that differentiated the treatment-resistant patients from the treatment responders were statistically significant between both groups. AD use ( $P<0.049$ ), improvement with medications ( $P<0.001$ ), suicide ( $P<0.042$ ), repeated visits ( $P<0.001$ ), changes in AD in the current year ( $P<0.001$ ), and adherence ( $P<0.002$ ).

**Table S3.** Comparison of the Laboratory Test Results between the Healthy Group vs. Depressed Group.

| Group | Healthy |      |      | Depression |      |      | P-value |
|-------|---------|------|------|------------|------|------|---------|
|       | N       | Mean | SD   | N          | Mean | SD   |         |
| CRP   | 80      | 6.5  | 11.5 | 67         | 57.1 | 82.7 | <0.001  |
| ESR   | 75      | 30.6 | 22.7 | 64         | 44.7 | 31.3 | 0.004   |
| WBC   | 102     | 7.5  | 2.4  | 99         | 8.9  | 4.8  | 0.007   |

CRP, C-reactive protein; ESR, erythrocyte sedimentation rate; WBC, white blood cell count. The levels of inflammatory biomarkers (CRP, ESR, and WBC) were significantly different between the groups: CRP ( $P<0.001$ ), ESR ( $P=0.004$ ), and WBC ( $P=0.007$ ).

**Table S4.** Comparison of the Laboratory Test Results between the Respondent Group vs. Resistant Group.

| Group | Respondent |       |      |     |        |      | Resistant |      |      |      |        |      | P-value |
|-------|------------|-------|------|-----|--------|------|-----------|------|------|------|--------|------|---------|
|       | N          | Mean  | SD   | Q1  | Median | Q3   | N         | Mean | SD   | Q1   | Median | Q3   |         |
| CRP   | 23         | 11.08 | 7.7  | 4.2 | 1.8    | 15.6 | 28        | 61.0 | 97.0 | 5.2  | 15.4   | 83.6 | 0.031   |
| ESR   | 21         | 27.2  | 12.4 | 8.0 | 5.0    | 53.0 | 22        | 50.7 | 31.4 | 30.0 | 43.0   | 64.3 | 0.048   |
| WBC   | 28         | 8.7   | 4.6  | 4.8 | 5.3    | 7.9  | 38        | 7.9  | 3.2  | 5.2  | 7.2    | 11.1 | 0.174   |

CRP, C-reactive protein; ESR, erythrocyte sedimentation rate; WBC, white blood cell count. The inflammatory biomarkers (CRP and ESR) showed a statistically significant difference between the groups: CRP ( $P=0.031$ ) and ESR ( $P=0.048$ ).

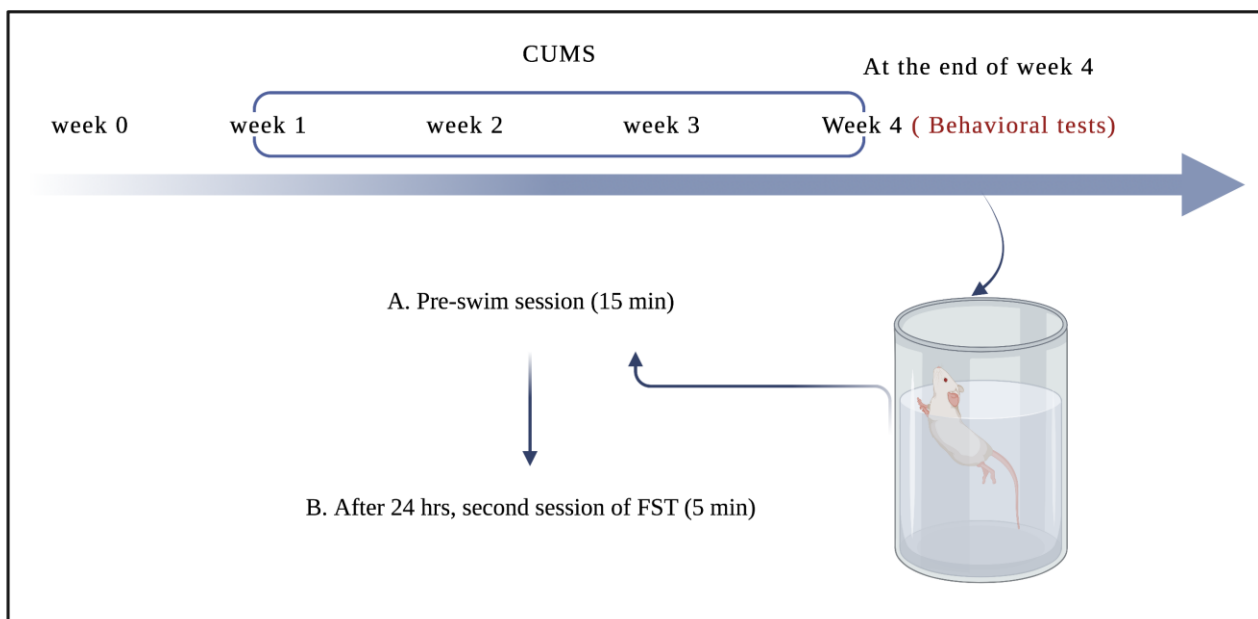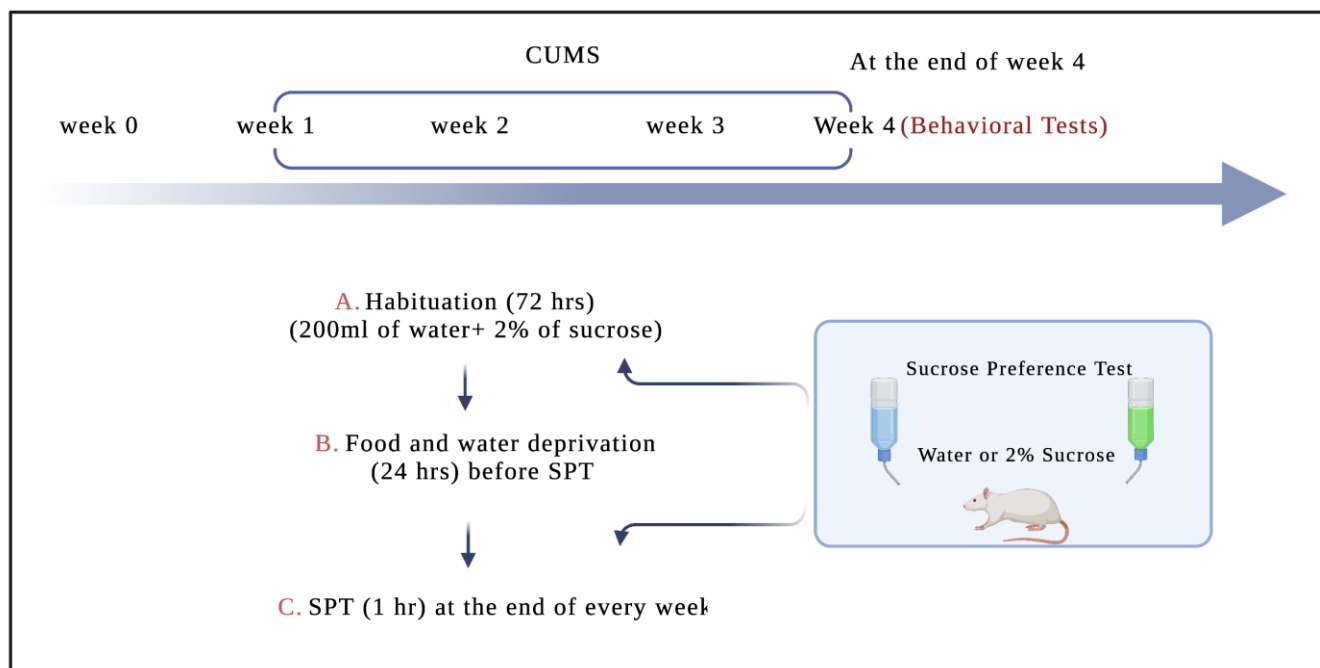

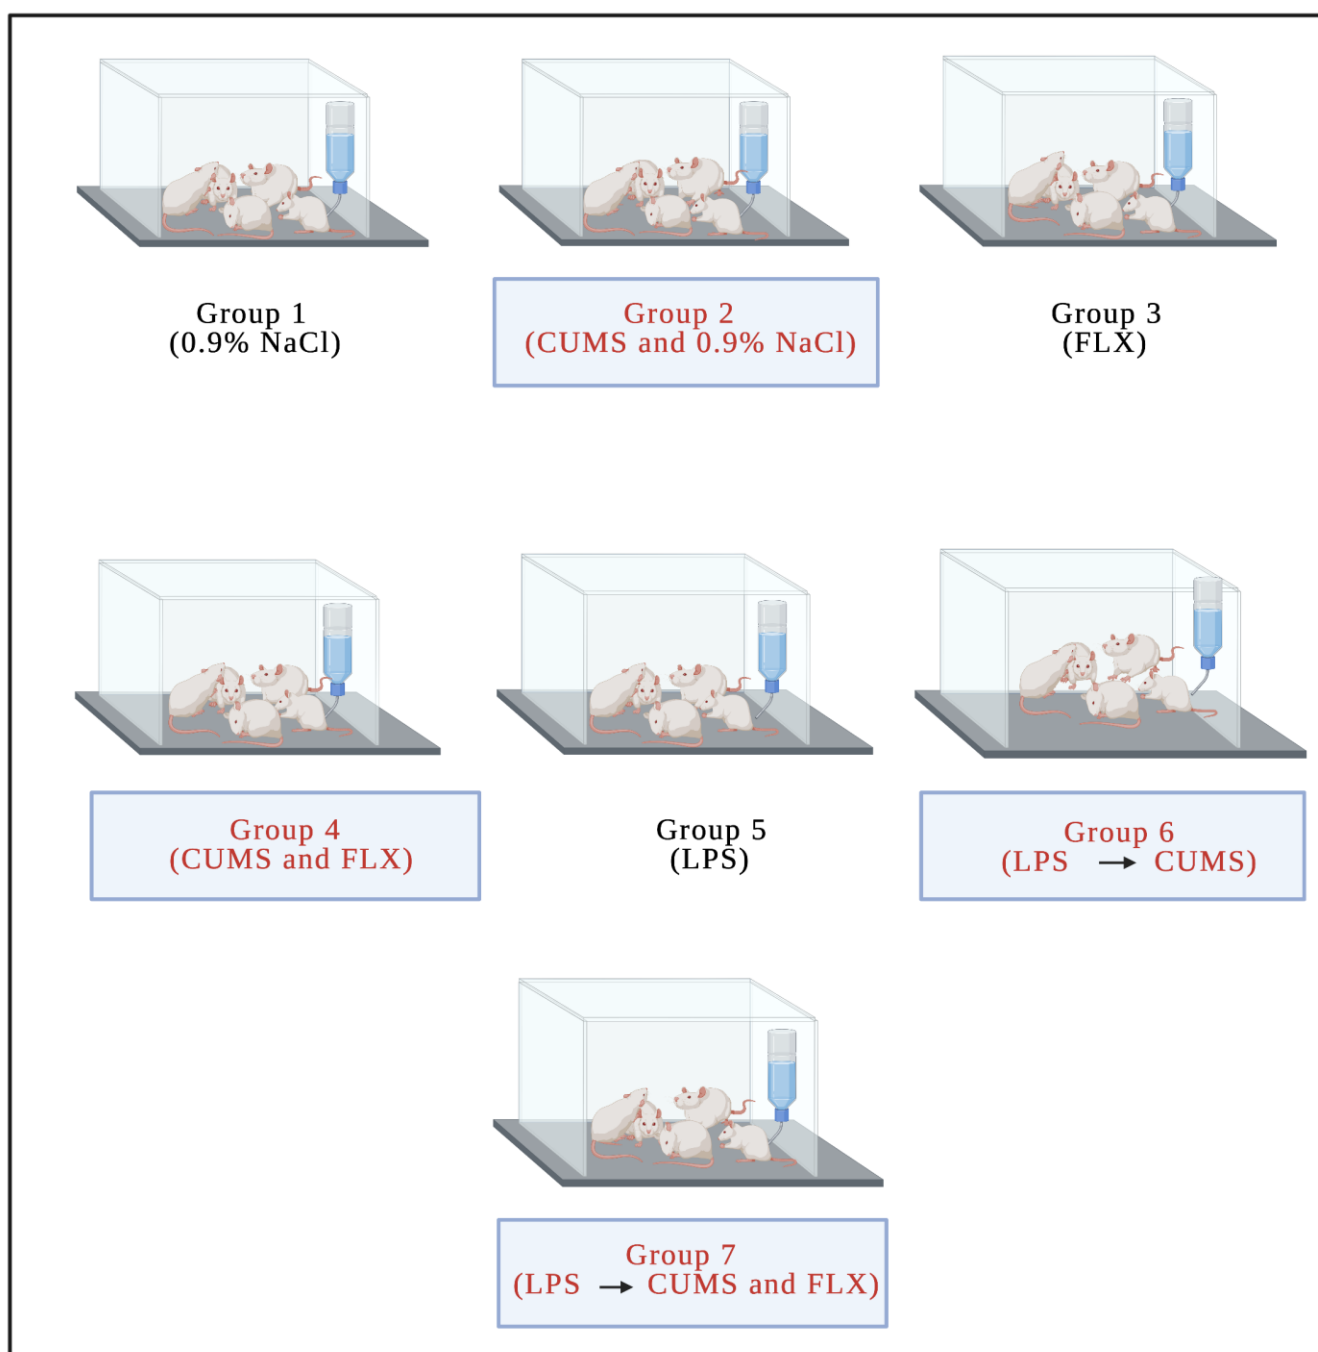

Figure S1.
